# Supplementary material for: Polymorphism in secondary squaramides: on the importance of π-interactions involving the four membered ring
Source: Royal Society of Chemistry journal article supplement (doi:10.1039/c7ce01945a), 2017-12-01

Electronic Supporting Information for

# Polymorphism in secondary squaramides: on the importance of $\pi$ -interactions involving the four membered ring

*Rafel Prohens,<sup>\*,a</sup> Anna Portell,<sup>a</sup> Oriol Vallcorba,<sup>b</sup> Mercè Font-Bardia,<sup>c</sup> Antonio Bauzá,<sup>d</sup> and Antonio Frontera<sup>\*,d</sup>*

<sup>a</sup>Unitat de Polimorfisme i Calorimetria, Centres Científics i Tecnològics, Universitat de Barcelona, Baldiri Reixac 10, 08028 Barcelona, Spain. E-mail: rafel@ccit.ub.edu.

<sup>b</sup>ALBA Synchrotron Light Source, Cerdanyola del Vallès, Barcelona 08920, Spain

<sup>c</sup>Unitat de Difracció de Raigs X, Centres Científics i Tecnològics, Universitat de Barcelona.

<sup>d</sup>Departament de Química, Universitat de les Illes Balears, Crta. de Valldemossa km 7.5, 07122 Palma (Balears), Spain. E-mail: toni.frontera@uib.es.

## Table of contents:

1. PXRD pattern of form 1a after long time showing transformation into 1d (+ $\alpha$ ) at room temperature. Red (PXRD pattern of form 1a simulated from SXRD), blue (PXRD pattern of form 1a after long time) and green (PXRD pattern of form 1d (+ $\alpha$ )).

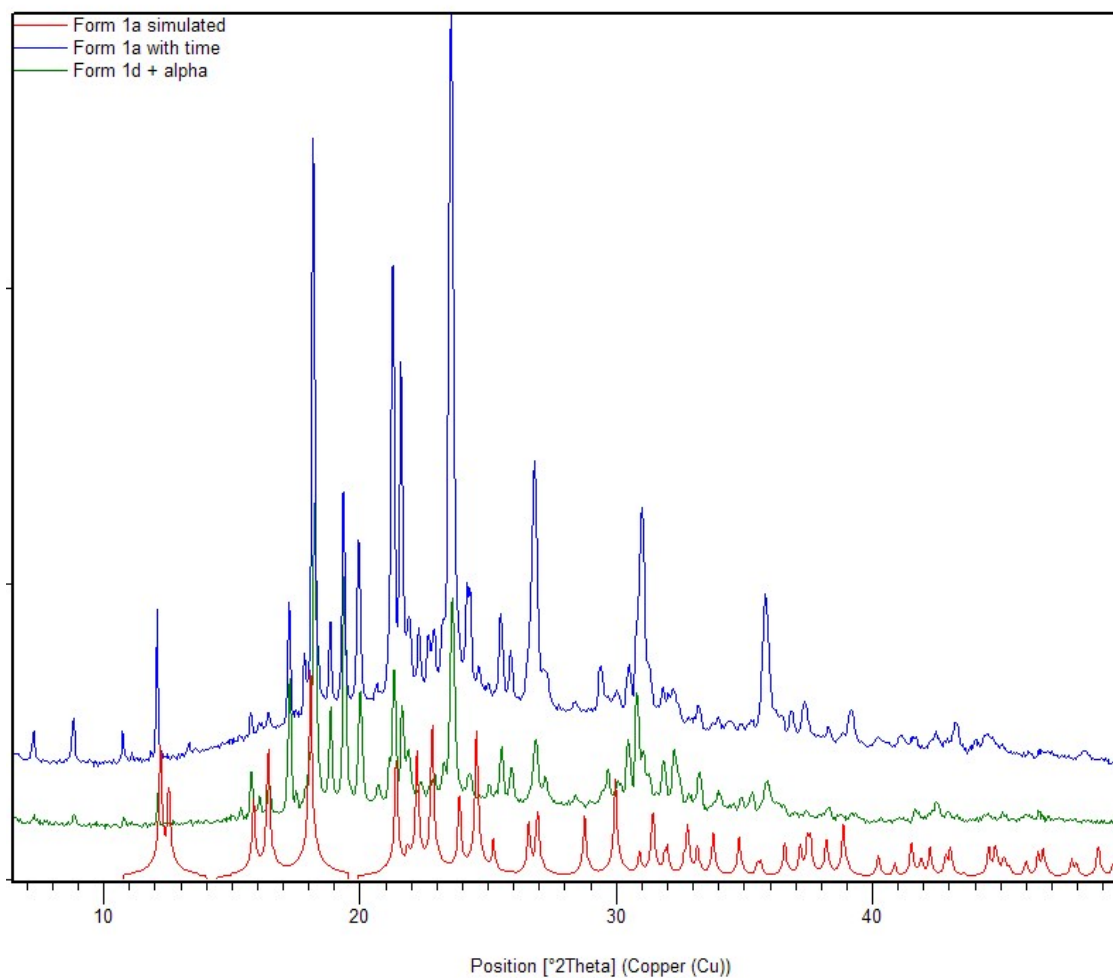

Supplement: c7ce01945a1.pdf [file c7ce01945a1.pdf]
